1     **Spatial and temporal diversity of positive selection on**  
2     **shared haplotypes at the *PSCA* locus among worldwide**  
3     **human populations**

4

5                     Risa L. Iwasaki<sup>1,2</sup> and Yoko Satta<sup>1,2,\*</sup>

6

7             <sup>1</sup>Department of Evolutionary Studies of Biosystems, School of

8     Advanced Science, SOKENDAI (The Graduate University for

9     Advanced Studies), Hayama, Kanagawa 240-0193, Japan.

10            <sup>2</sup>Research Center for Integrative Evolutionary Science,

11                                     SOKENDAI

12            \*Corresponding Author: E-mail: <satta@soken.ac.jp>

13                                     Word count for text: 5512 words

14     Running title: Switching of selection target haplotype in *PSCA*

15                                     locus

16

## 17 Abstract

18           Selection on standing genetic variation is important for  
19 rapid local genetic adaptation when the environment changes. We  
20 report that, for the prostate stem cell antigen (*PSCA*) gene,  
21 different populations have different target haplotypes, even  
22 though haplotypes are not unique to specific populations. The  
23 C-C-A haplotype, whereby the first C is located at rs2294008 of  
24 *PSCA* and is a low risk allele for gastric cancer, has become a  
25 target of positive selection mainly in Asian populations. Conversely,  
26 the C-A-G haplotype carrying the same C allele has become a  
27 selection target in African populations. However, Asian and  
28 African populations share both haplotypes, consistent with the  
29 haplotype divergence time (170 kya) prior to out-of-Africa. The  
30 frequency of C-C-A/C-A-G is 0.344/0.278 in Asia and 0.209/0.416 in  
31 Africa. 2D-SFS analysis revealed that the extent of intra-allelic

32    variability of the target haplotype is extremely small in each local  
33    population, suggesting that C-C-A or C-A-G is under ongoing hard  
34    sweeps in local populations. From the TMRCA of selected  
35    haplotypes, the estimated onset times of positive selection were  
36    recent (3-55 kya), concurrently with population subdivision from a  
37    common ancestor. Additionally, estimated selection coefficients  
38    from ABC analysis were up to ~3%, similar to those at other loci  
39    under recent positive selection on standing genetic variation.  
40    Phylogeny of local populations and TMRCA of selected haplotypes  
41    revealed that spatial and temporal switching of positive selection  
42    targets is a unique and novel feature of ongoing positive selection  
43    at *PSCA*. This switching may reflect potential of rapid adaptability  
44    to distinct environments.

## 45 Introduction

46           Selective sweeps can be classified into two cases, whereby  
47 the target allele is either single (classic hard sweep) or multiple  
48 (soft sweep) in a tested population (Rees et al. 2020). The former  
49 describes that a *de novo* mutation emerges and the allele soon after  
50 becomes advantageous. Many neutrality tests are designed to  
51 detect signatures of this type of classic hard sweep. In contrast, the  
52 latter, soft sweep, includes more complicated processes of positive  
53 selection. One of such processes includes a typical case where a *de*  
54 *novo* mutation emerges within a particular haplotype but is  
55 maintained under neutrality. Through genetic drift, the haplotype  
56 number increases and is then maintained as standing genetic  
57 variation. Environmental change may result in the onset of  
58 selection on multiple haplotypes. In humans, both *MCPH1* and  
59 *ADAM17* are such examples in East Asian populations (Satta et al.

2020). *MCPH1* is associated with brain size development (Evans et al. 2005); haplogroup D at *MCPH1* is composed of multiple haplotypes that carry the derived C allele at G37995C and is a selection target. Similarly, there are multiple target haplotypes at *ADAM17* (Satta et al. 2020). *ADAM17* is involved in the *NRG-ERBB1* signaling pathway, and variants in genes of this pathway are associated with the risk of schizophrenia and psychiatric phenotypes (Pickrell et al. 2009). Other cases of soft sweeps include repeated advantageous alleles that emerged from different genetic backgrounds (recurrent mutations), as well as gene conversion of adaptive mutations into a new genetic background (Jones and Wakeley 2008; Rees et al. 2020).

As one of the major causes of soft sweeps, standing genetic variation in a mother population is reported to contribute to rapid adaptation of a daughter population to a novel niche. In

75 sticklebacks, neutral polymorphism of genes in a mother  
 76 population living in seawater became adaptive when a daughter  
 77 population colonized from seawater to freshwater. For example,  
 78 polymorphisms containing adaptive alleles at both *Eda* (Colosimo  
 79 et al. 2005) and *KITLG* genes (Miller et al. 2007) associated with  
 80 light skin pigmentation contributed to the adaptation to  
 81 freshwater. Similarly, copy number variation in the *FADS2* gene  
 82 (Ishikawa et al. 2019), which encodes an enzyme that synthesizes  
 83 DHA, affects the survival rate in freshwater. Interestingly,  
 84 orthologous *KITLG* in humans is also associated with light skin  
 85 pigmentation. Standing genetic variation at this locus in Africa  
 86 contributes to parallel adaptation for vitamin D synthesis due to  
 87 the reduced UV light in both Asia and Europe (Miller et al. 2007).  
 88 The common functional haplotype in both populations becomes a  
 89 target of recent positive selection.

90           Schridder et al. (2017) scanned the human genome using a  
91   machine learning method S/HIC for detecting loci under completed  
92   positive selection; they revealed that most loci under selection are  
93   classified into soft sweeps (including standing genetic variation)  
94   rather than classic hard sweeps. Although Schridder et al. did not  
95   examine each case in detail, we expect many unexplored loci under  
96   completed/ongoing soft sweeps and that such loci may be  
97   associated with rapid adaptation to new environments.

98           Another approach for detecting signals of both soft and  
99   hard sweeps is the two-dimensional site frequency spectrum  
100   (2D-SFS) method. Summary statistics ( $F_c$ ,  $G_{c0}$  and  $L_{c0}$ ) in 2D-SFS  
101   (Fujito et al. 2018; Satta et al. 2020) evaluate the decay of  
102   intra-allelic variability (IAV) of haplotypes carrying a target site  
103   (D-group) due to selective sweep compared with that of haplotypes  
104   under neutrality (A-group). The 2D-SFS method can identify a

105 target site among different populations and distinguish signals of  
 106 ongoing selection from completed selection based on three  
 107 summary statistics. Combined with target haplotype TMRCA ( $t_D$ ),  
 108 we can estimate the onset times of positive selection and  
 109 reconstruct the history of positive selection in individual  
 110 populations.

111 Humans migrated from Africa to most corners of the  
 112 Earth during a short period of at most 70 thousand years (Soares  
 113 et al. 2012; Haber et al. 2019) and subsequently have genetically  
 114 adapted to various novel environments, e.g. reduced UV light, low  
 115 temperature, high altitude, novel pathogens and dietary changes.  
 116 Many studies have been conducted to investigate associations  
 117 between signatures of positive selection and causal selective  
 118 pressures (reviewed in Rees et al. 2020). At some of these  
 119 signatures on target loci, onset times of positive selection are



120 inferred to be relatively recent (within ~50 thousand years). In  
121 some cases, the same allele parallelly became a selection target in  
122 genetically distinct populations (Xue et al. 2006; Yang et al. 2018).

123         We previously detected three shared haplotypes of the  
124 prostate stem cell antigen (*PSCA*) gene in two East Asian  
125 populations, Japanese in Tokyo (JPT) and Han Chinese in Beijing  
126 (CHB) (Iwasaki et al. 2020). Two haplotypes carry a C allele at  
127 rs2294008 (T/C) in the first position (C-C-A/C-A-G haplotype) and  
128 are associated with low risk of gastric cancer (The Study Group of  
129 Millennium Genome Project for Cancer 2008; Tanikawa et al.  
130 2012), and the other haplotype carrying a T allele (T-C-A) is  
131 associated with high risk of gastric cancer. Among the three,  
132 C-C-A/C-A-G haplotypes were found to be under ongoing positive  
133 selection. A signal of ongoing hard selective sweep was detected in  
134 the C-C-A haplotype alone in JPT. In contrast, such signals were

135 detected in both C-C-A and C-A-G haplotypes in CHB, which is  
136 suggestive of an ongoing soft selective sweep in CHB. The three  
137 haplotypes are shared not only between JPT and CHB, but are also  
138 found worldwide including African populations. This supports that  
139 the two selected haplotypes, C-C-A and C-A-G, diverged before  
140 out-of-Africa. Indeed, the divergence time of the two haplotypes is  
141 estimated to be 170 kya (thousand years ago) (Albers and McVean  
142 2020). We hypothesize that either or both of these haplotypes are  
143 under selection in different subpopulations in the 1000 genomes  
144 project (1KGP). To test this hypothesis, we apply the 2D-SFS  
145 method and examine the extent of IAV and  $t_D$  (TMRCA).  
146 Furthermore, using an ABC framework, we estimate the onset  
147 times of selection as well as selection coefficients. Based on these  
148 results, we discuss unique features of this selection.  
149

## 150 Materials and Methods

### 151 Test populations

152           We retrieved variant call format (VCF) data of 26  
153 subpopulations in five superpopulations (East Asian (EAS),  
154 European (EUR), South Asian (SAS), American (AMR), and  
155 African (AFR)) from 1KGP Phase 3 (The 1000 Genomes Project  
156 Consortium 2015). We followed each population code in the  
157 definition of 1KGP and used the GRCh37 genomic positions for  
158 each SNP. The ancestral/derived alleles are defined in 1KGP.

### 159 Neutrality test with Two-Dimensional Site Frequency Spectrum 160 (2D-SFS) and TMRCA of target haplotype

161           We defined 2D-SFS with  $\varphi_{i,j}$ , which is the sum of the  
162 number of SNPs whose configuration is  $i$  derived alleles in the  
163 D-group and  $j$  derived alleles in the A-group (Fujito et al. 2018;  
164 Satta et al. 2020). We evaluated IAV with a particular frequency of

165 target allele by using  $\phi_{i,j}$ . This method has the advantage of being  
 166 able to detect incomplete and complete selective sweeps. We  
 167 defined the core region for detection of selection by 2D-SFS in the  
 168 following steps: we calculated  $r^2$  with rs2294008 per SNP and the  
 169 average  $r^2$  in each 1000 bp non-overlapped sliding window, and  
 170 then determined the boundaries of the core region based on SNPs  
 171 with  $r^2 > 0.75$ . For one of the African subpopulations, MSL, the size  
 172 of the core region determined by the above method was too short  
 173 (2000 bp) for analysis; thus, we simply defined the boundaries of  
 174 the core region using SNPs with  $r^2 > 0.75$  without calculating  
 175 average  $r^2$ .

176 We calculated Q-values with Benjamini-Hochberg  
 177 procedure (Benjamini and Hochberg 1995) to archive FDR controls  
 178 for each of the summary statistics of 2D-SFS ( $F_c$ ,  $G_{c0}$  and  $L_{c0}$ ) and  
 179 evaluated their significances (Q-value  $< 0.05$ ). If there were more

180 than one significant summary statistic, we defined this as a signal  
181 of positive selection. We further classified this signal into  
182 completed or ongoing: significant values in  $G_{c0}$  and  $L_{c0}$  but not in  $F_c$   
183 were interpreted as completed positive selection based on Satta et  
184 al. (2020), and otherwise classified as ongoing positive selection.  
185 Additionally, in the cases where only one summary statistic  
186 showed a significant value, we further calculated a combined  
187 P-value (Brown 1975) for the three summary statistics, and a  
188 highly significant combined P-value ( $P < 0.01$ ) was also defined as  
189 positive selection.

190 Null distributions of the three summary statistics were  
191 generated using ms (Hudson 2002) under neutrality with  
192 demographic models based on Schaffner et al. (2005). From the  
193 simulated data, we chose at least 1000 replicates of  
194 simulated/pseudo target sites that had similar frequency to the

195 true/observed frequency of the target site.

196           Additionally, we estimated TMRCA ( $t_D$ ) of the target  
197 haplotype (D-group). The value of  $ut_D$  is the average number of  
198 substitutions per lineage in the D-group that is  $L_{\zeta 0}/m$ , where  $L_{\zeta 0} =$   
199  $\sum_{k=1}^{m-1} k\phi_{k,0}$ ,  $m$  is the number of target alleles or haplotypes and  $u$  is  
200 the mutation rate per region per year (Satta et al. 2020). We  
201 applied  $0.5 \times 10^{-9}$ /site/year for mutation rate (Scally and Durbin  
202 2012) to calculate  $t_D$ . For measuring  $t_D$  in generations, the  
203 generation time is 29 years (Fenner 2005).

204 A framework of ABC for inferring onset of positive selection and  
205 selection coefficient ( $s$ )

206           We performed two simulation steps to obtain estimates of  
207 onset times of positive selection and selection coefficients ( $s$ ) for  
208 three populations (JPT, YRI and CHB): (i) we generated samples  
209 using mssel implemented with positive selection (dominance

210 coefficient ( $h$ ) was set as 0.5) and accepted 10,000 replications with  
 211 target site frequencies within  $\pm 5\%$  of observed target site  
 212 frequency (Nakagome's ABC procedure (Nakagome et al. 2019));  
 213 (ii) of these 10,000 replications, we accepted replications with  
 214 summary statistics ( $F_c$ ,  $\gamma(10)$ ,  $\gamma^*(10)$  and  $i_{max}$ ) that were within  $\pm$   
 215 1% of observed values in a test population. Finally, we estimated  
 216 95% CIs of  $s$  and onset times of positive selection from accepted  
 217 replications.

218 C-C-A/C-A-G haplotypes are shared among all  
 219 subpopulations studied (including African populations); this  
 220 suggests that frequencies of these haplotypes should be higher  
 221 than  $1/2N$ , where  $N$  is effective population size of each local  
 222 population. Therefore, we used a SSV (standing variant) model of  
 223 mssel, but the uniform distribution (the prior distribution of allele  
 224 frequency at selection onset ( $f_t$ )) in the original model was modified

225 with a simulated allele frequency distribution without  
226 recombination (see below).

227 We simulated the prior distribution of  $f_t$  with the  
228 following procedure. We first defined the three haplotypes (C-C-A,  
229 C-A-G and T-C-A) based on three SNPs (rs2294008 (T/C),  
230 rs2976391 (C/A) and rs2978983 (A/G)). We then estimated the  
231 order of emergence of the three haplotypes based on  
232 derived/ancestral states and the divergence times of the three  
233 SNPs. The divergence times of the SNPs were estimated from the  
234 atlas of variant age (Albers and McVean 2020) (Fig. 1). C-C-A  
235 diverged from T-C-A 1,065,141 ya (36,729 gen. ago) as a *de novo*  
236 haplotype; then, C-A-G with two mutations (a derived A allele at  
237 rs2976391 (168,432 ya) and a derived G allele at rs2978983  
238 (171,999 ya)) diverged from C-C-A 168,432 ya (5,808 gen. ago).  
239 Then, we simulated the frequency of a target haplotype for 10,000



240 replications, considering the above evolutionary process and  
 241 demography of each test population based on Schaffner et al.  
 242 (2005). The 10000 replications did not include cases where any  
 243 haplotypes were fixed or lost before the onset of positive selection.  
 244 We generated a distribution of target allele frequency at the onset  
 245 of positive selection respectively at  $t_D/29$  generations ago. For  
 246 JPT and YRI, we generated a distribution of each single target  
 247 haplotype (C-C-A or C-A-G) frequency. In contrast, for CHB, we  
 248 treated C-C-A and C-A-G as a single C haplotype. Then, the  
 249 frequency of the C haplotype was set based on the summated  
 250 frequencies of both haplotypes. We used  $t_D$  of the C haplotype in  
 251 CHB as 28,225 ya. We divided haplotype frequency distributions  
 252 into bins from 0.0 to 1.0 with increments of 0.01 and drew a  
 253 histogram as the ft prior distribution. Replications did not accept  
 254 any case where ft exceeded observed target allele frequency in each

255 test population (Nakagome et al. 2018).

256

## 257 Results

258 Different selection target among populations genetically closely

259 related

260 Reduction in genetic diversity in the D-group (with core

261 region strongly linked with a target allele) is due to selective sweep.

262 This trait is exploited to detect signatures of positive selection on

263 putative target alleles with the 2D-SFS method (Satta et al. 2020).

264 Summary statistics of 2D-SFS are robust against violation of

265 genetic diversity reduction caused by recombination (Iwasaki et al.

266 2020; Satta et al. 2020), and thus they can detect older signals of

267 positive selection compared to haplotype-based tests (e.g.  $nS_L$ )

268 (Oleksyk et al. 2010; Ferrer-Admetlla et al. 2014). We applied the

269 2D-SFS method to 1KGP data to detect signals of positive selection

270 on C-C-A and C-A-G haplotypes in different subpopulations.

271 No signals are detected on the two haplotypes in most of

272 the AMR and EUR subpopulations (Table1). The frequency of the

273 C-C-A haplotype is too low ( $<10\%$ ) in all subpopulations to detect

274 signals. Especially, the C-C-A haplotype in both FIN and GBR

275 show no private alleles in the D-group. Therefore, we conclude that

276 all subpopulations in AMR and EUR have no signals of selection

277 acting on the C-C-A haplotype, even though the combined P-value

278 is marginally significant (e.g. GBR for  $P = 0.017$ ). The C-A-G

279 haplotype in PEL shows low values in  $F_c$  ( $Q = 0.002$ ) and combined

280  $P$  ( $P = 0.016$ ); PEL allele configuration shows two SNPs

281 (rs75914363:  $\phi_{87,0} = 1$ ; rs2920288:  $\phi_{92,0} = 1$ ) that have similar

282 number of derived alleles as the C-A-G haplotype (93 haplotypes).

283 Consequently, this results in a low  $F_c$  value but high  $G_{c0}$  and  $L_{c0}$

284 values (Satta et al. 2020) and a significant combined  $P$  value.

285 Therefore, the presence of  $\varphi_{87,0}$  and  $\varphi_{92,0}$  is considered to be due to  
 286 missampling of recombinants,  $\varphi_{87,j}$  and  $\varphi_{92,j}$ , where  $j$  is a positive  
 287 integer. We conclude that the signal from PEL in C-A-G is false  
 288 positive. The C-A-G haplotype in PUR and CEU show significant  
 289 values in  $L_{c0}$  alone, but the former shows a non-significant  
 290 combined P value ( $P = 0.052$ ); the latter shows a marginally  
 291 significant combined P value ( $P = 0.046$ ). Both signals in PUR and  
 292 CEU can not be classified into any of the defined sweeps (Satta et  
 293 al. 2020) (see Materials and Methods).

294 In non-AMR/EUR subpopulations, signals of selection are  
 295 detected in either or both haplotypes. In all AFR subpopulations,  
 296 ongoing positive selection on the C-A-G haplotype is detected.  
 297 Values of  $i_{max}$ ,  $\gamma(10)$  and  $\gamma^*(10)$  are supportive of hard selective  
 298 sweeps in AFR. Additionally, ESN and YRI show significant  $L_{c0}$   
 299 values only in the C-C-A haplotype. ESN also shows a marginally

300 significant combined P value ( $P = 0.040$ ). For the same reason as in  
 301 CEU, we do not regard this case as a positive selection signal. In  
 302 contrast, YRI shows a non-significant combined P value ( $P =$   
 303  $0.062$ ).

304 In SAS subpopulations, we observe three patterns of  
 305 selection signals. First, a signal of ongoing positive selection on the  
 306 C-C-A haplotype only in BEB is detected. Values of  $i_{\max}$ ,  $\gamma(10)$  and  
 307  $\gamma^*(10)$  in BEB are indicative/supportive of a hard selective sweep.  
 308 Second, no signals for selection on any of the haplotypes in GIH  
 309 and PJJ are detected. Third, both STU and ITU show  
 310 non-significant values of  $F_c$  but significant values of  $G_{c0}$  and  $L_{c0}$  in  
 311 the C-C-A haplotype. This observation may imply that completed  
 312 positive selection has acted on the C-C-A haplotype in both STU  
 313 and ITU (see Materials and Methods).

314 In contrast, EAS subpopulations show two patterns of

315 selection signals. We detect selection signals on C-C-A in JPT, CHS,  
316 KHV and CDX, and we find signals acting on both C-C-A and  
317 C-A-G haplotypes in CHB (Table 1). Based on the  $i_{\max}$ ,  $\gamma(10)$  and  
318  $\gamma^*(10)$  values, these signals are all indicative of hard selective  
319 sweeps. For the C-A-G haplotype in CHS, there is only a  
320 significant  $L_{c0}$  value ( $Q = 0.042$ ) and a marginally significant  
321 combined P value ( $P = 0.032$ ). For the same reasons as in CEU, we  
322 do not regard this as a positive selection signal. IAV of both  
323 haplotypes in CHB show signals of positive selection. Therefore,  
324 we conclude that the selective sweep acting on the two haplotypes  
325 in CHB appears to be soft. Variations in the pattern of selection  
326 signals are observed especially in Asian populations. This suggests  
327 that the target of selection can differ among subpopulations, even  
328 if they are genetically close and their habitat environments are  
329 seemingly similar.

### 330 Inference of positive selection onset times

331           We estimate TMRCA of the D-group ( $t_D \pm SD$ ) of the C-C-A  
332 or C-A-G haplotype (Fig. 2 and Table 1). TMRCA is the time for all  
333 D-group sequences to coalesce to a common ancestor (Satta et al.  
334 2020). When the target haplotype is novel within a test population  
335 (hard selective sweep), the estimated  $t_D$  is equivalent to the onset  
336 time of positive selection or earlier due to the waiting time of the *de*  
337 *novo* mutation (Satta et al. 2020). The values of  $t_D$  of C-C-A  
338 haplotypes are limited within 8-30 kya (BEB: 8,130 ya for the  
339 minimum, CHB: 30,063 ya for the maximum) and those of C-A-G  
340 haplotypes are limited within 20-40 kya (YRI: 19,540 ya for the  
341 minimum, LWK: 38,596 ya for the maximum) in all subpopulations.  
342 The values of  $t_D \pm SD$  are limited within 3-42 kya for C-C-A and  
343 13-55 kya for C-A-G. We also estimate the onset time for  
344 JPT/CHB/YRI using the ABC framework with samples generated

345 with mssel (Nakagome et al. 2019) implemented with positive  
346 selection and compare them with the above  $t_D$  values.

347 Mean onset times estimated by the ABC framework (ABC  
348 onsets) are 7,334 ya (C-C-A haplotype in JPT) and 13,845 ya  
349 (C-A-G haplotype in YRI). In CHB, two haplotypes have very  
350 similar  $t_D$  values and they show significant low  $F_c$  and  $L_{c0}$  values in  
351 2D-SFS (Fig. 2 and Table 1); therefore, we regard both C-C-A and  
352 C-A-G as a single haplotype (C haplotype) carrying a derived (C)  
353 allele at rs2294008. The mean ABC onset in CHB is estimated to  
354 be 18,174 ya (Table 2 and Fig. 4A). All  $t_D \pm SD$  values are within  
355 the range of the 95% CI of ABC onsets.

356 Additionally, we infer selection coefficients using the ABC  
357 framework. Estimated means of  $s$  are 1.89% for C-C-A in JPT,  
358 2.90% for C-A-G in YRI and 1.94% for the C haplotype in CHB; all  $s$   
359 values are lower than 3% (Table 2 and Fig. 4B).



360

## 361 Discussion

### 362 Transition process of target haplotypes of positive selection

363           We estimate the number of transitions of target  
364 haplotypes along the human lineage in a parsimonious manner,  
365 considering  $t_D$  values and current target haplotypes in  
366 subpopulations together with the phylogeny based on pairwise  $F_{ST}$   
367 values among 1KGP subpopulations (The 1000 Genomes Project  
368 Consortium 2015) (Fig. 3). We assume that positive selection did  
369 not act on any haplotypes in the human common ancestor (before  
370 out-of-Africa), as  $t_D$  values of selected haplotypes are more recent  
371 than out-of-Africa. The estimation results suggest that positive  
372 selection on target haplotypes would cease/relax and operate  
373 several times within each subpopulation or lineage, leading to the  
374 extant subpopulations after population splits. For example, for

EUR and AMR, although they possess the two haplotypes, no signatures of positive selection in *PSCA* are detected. In contrast, the C-A-G haplotype in African subpopulations has been selected independently four times (Fig. 3), and positive selection target switched between C-A-G and C-C-A haplotypes multiple times in Asian subpopulations (see below).

In EAS subpopulations, target haplotypes are not the same between JPT and CHB, despite these populations being genetically close. The maximum  $t_D$  of EAS is 30063 ya for the C-C-A haplotype and 27,027 ya for the C-A-G haplotype in CHB (Fig. 2). The Jomon population is one of the ancestral populations to the Japanese that split off from the stem lineage leading to the extant East Asian populations around 18-38 kya (Wang et al. 2018; Kanzawa-Kiriyama et al. 2019; Gakuhari et al. 2020). This period overlaps with the  $t_D \pm SD$  (13-42 kya) of the C-C-A and C-A-G

390 haplotypes in CHB, suggesting that target haplotypes have been  
 391 maintained from an East Asian common ancestor. In contrast, we  
 392 do not detect any signals of positive selection on the C-A-G  
 393 haplotype in JPT/CHS/CDX/KHV (Fig. 3 and Table1). This  
 394 suggests that target haplotypes have transitioned from two  
 395 haplotypes in a common ancestor (C-C-A and C-A-G) to a single  
 396 haplotype (C-C-A) in all four populations. The phylogenetic  
 397 relationship among CDX/KHV, CHS and JPT implies transitions  
 398 are independent events in the three lineages.

399           Different from EAS subpopulations, only the C-C-A  
 400 haplotype has been a target of selection in SAS. We detect a signal  
 401 of ongoing positive selection in BEB and signals of completed  
 402 positive selection in ITU and STU, whereas no selection signals are  
 403 found in PJL and GIH. Parsimoniously considering these  
 404 observations with the topology of the phylogeny (Fig. 3), selection

405 on the C-C-A haplotype may have started to act in a common  
406 ancestor of BEB/ITU/STU. Then, positive selection was  
407 relaxed/ceased in a common ancestor of ITU and STU. In contrast,  
408 selection is still present in the extant BEB. The inferred  
409 divergence times of these SAS subpopulations have not been  
410 determined so far, thus making it difficult to discuss transition  
411 events of target haplotypes in detail.

412           In all AFR subpopulations, C-A-G is a common target  
413 haplotype. African demography is complex (Busby et al. 2016) and  
414 the examined African subpopulations share either or both western  
415 or/and eastern African ancestry with each other (Lachance et al.  
416 2012; Excoffier et al. 2013; The 1000 Genomes Project Consortium  
417 2015; Fan et al. 2019). One of the western African populations, YRI,  
418 and an admixed population of western African and eastern African,  
419 LWK (Henn et al. 2011; Excoffier et al. 2013; Gurdasani et al. 2015),

420 diverged 100-300 kya (Terhorst et al. 2017). Although 1KGP did  
 421 not cover subpopulations in eastern/southern Africa and there  
 422 missing data of divergence times of some African subpopulations,  
 423 the divergence time between LWK and YRI indicates that African  
 424 subpopulations diverged earlier than the onset timings of positive  
 425 selection ( $t_D \pm SD$ : 13-55 kya). The divergence time of the two  
 426 subpopulations and the timing of positive selection parsimoniously  
 427 suggest that positive selection on C-A-G in African subpopulations  
 428 may have proceeded in parallel (Fig. 3).

429         Target haplotypes are different among subpopulations,  
 430 revealing that adaptive alleles in each subpopulation are not  
 431 always the same. Phylogenetic and  $t_D$  analyses suggest that an  
 432 adaptive allele in a subpopulation may change temporally and also  
 433 differ spatially to other subpopulations. This change may follow  
 434 some form of environmental transition. In both AFR

435 subpopulations and CHB, the C-A-G haplotype is the target of  
 436 selection and the values of  $t_D$  are limited to more recent times,  
 437 after out-of-Africa and subsequent population subdivision. This  
 438 suggests that global environmental transitions may have caused a  
 439 switch of selection operation among distinct subpopulations. In  
 440 order to elucidate the global and local selective forces and to  
 441 reconstruct the process of target haplotype transition, we need to  
 442 survey selection signals in additional populations in the future. In  
 443 particular, to determine the target haplotypes under selection in  
 444 other populations and when target changed in other populations  
 445 considering the EAS and Jomon split in the phylogeny, EAS  
 446 subpopulations not included in 1KGP should be examined.  
 447 Furthermore, we need to examine the association between global  
 448 environmental change and the onset timing of positive selection.

449 The relationships between  $t_D$  and inferred onsets of positive selection

450 Using the approach by Satta et al. (2020), the timing of

451 positive selection onset by calculating TMRCA of the D-group ( $t_D \pm$

452 SD) is estimated as  $10,811 \pm 8,058$ ,  $28,266 \pm 9,300$  and  $19,540 \pm$

453  $5,747$  for C-C-A in JPT, the C haplotype in CHB and C-A-G in YRI,

454 respectively (Fig. 2). We compare  $t_D \pm$  SD values with inferred

455 onsets of positive selection from the ABC framework. Given the  $f_t$

456 (allele frequency at selection onset) and current observed

457 frequency, the ABC framework can estimate ABC onsets (i.e. the

458 timing of positive selection operation) through simulations

459 (Nakagome et al. 2019). As a result, for JPT, CHB and YRI, ranges

460 of ABC onset 95% CI are wide enough to cover the respective  $t_D \pm$

461 SD values (Table 2 and Fig. 4A). We also compare  $t_D \pm$  SD with

462 ABC onset 95% CI from Nakagome's original ABC framework

463 based on uniform distribution of  $f_t$  (see Materials and Methods).

464 Although ranges of the ABC onset 95% CI cover the respective  $t_D \pm$   
 465 SD values (data not shown), difference between the range of ABC  
 466 onset 95% CI and  $t_D \pm$  SD is reduced if we use a prior  $t_f$  distribution  
 467 that is generated from simulation of  $t_f$  rather than a uniform  
 468 distribution. It is concluded that  $t_D \pm$  SD is supported by ABC onset  
 469 95% CI regardless of prior distributions of  $t_f$ , suggesting that the  
 470 ranges of  $t_D \pm$  SD are robust.

471 Comparison of selection coefficients with those of other genes under  
 472 selective sweeps

473 Selection coefficients ( $s$ ) of the two haplotypes range from  
 474 1.9-2.9% in JPT/CHB/YRI (Table2). Since the  $t_D$  of both haplotypes  
 475 implies that positive selection likely acted recently, we first  
 476 compare these  $s$  values to that of two representative genes under  
 477 recent positive selection characterized to be involved in  
 478 gene-culture coevolution: *LCT*, which is associated with lactase



479 persistence among people of European ancestry (Gerbault et al.  
480 2009; Itan et al. 2009; Peter et al. 2012), and *ADH1B*, which is  
481 associated with alcohol metabolism in CHB (Peter et al. 2012). The  
482  $s$  of the C-C-A/C-A-G haplotypes are found to be equivalent to or  
483 smaller than  $s$  of *LCT* ( $s \leq 9.6\%$ ) and *ADH1B* ( $s = 3.6\%$ ).

484         Next, we compare the  $s$  values with those of seven  
485 representative genes involved in responses to the outside  
486 environment and related to population differentiation. For *TRPM8*,  
487 a gene where selection acts in parallel among non-African  
488 populations (Key et al. 2018) and is associated with an endogenous  
489 response to cold temperature,  $s$  is estimated to be  $\sim 1.5\%$ ; this is  
490 equivalent to the  $s$  of the two haplotypes. For the genes associated  
491 with skin pigmentation or morphology, most of the  $s$  values are  
492 equivalent to those of the two haplotypes: 1-2% for *KITLG*  
493 independently in East Asian and European populations (Beleza et

494 al. 2013), 2-3% for *TYRP1* in European populations (Beleza et al.  
495 2013), 4-5% for *SLC45A2* in European populations (Beleza et al.  
496 2013) and 2.9% for *ASPM* in European populations (Peter et al.  
497 2012). In contrast,  $s$  values at *EDAR* ( $s \leq 14\%$ ; associated with  
498 hair and teeth morphology in East Asian populations (Kamberov et  
499 al. 2013; Peter et al. 2013)) and *SLC24A5* ( $s = 8\text{-}16\%$ ; associated  
500 with light skin pigmentation in European populations (Beleza et al.  
501 2013)) show much larger values than those of the two haplotypes.

502 Finally, we assume that immune genes, which are  
503 associated with susceptibility to diseases, are under strong  
504 selective pressures, and thus, compare the  $s$  values of four  
505 representative immune genes with those of the two haplotypes.  
506 The  $s$  values of the two haplotypes are higher than most of those of  
507 *MHC* ( $s = 0.03\text{-}4\%$ ), which play a major role in immune responses  
508 (Yasukochi et al. 2013). A *CASP12* variant that is resistant to

509 severe sepsis and under positive selection shows smaller values ( $s$   
510  $= 0.5\text{-}1\%$  (Wang et al. 2006; Xue et al. 2006)) in human populations  
511 than that of the two haplotypes. In contrast, genes associated with  
512 resistance to malaria and under positive selection in African  
513 populations show larger  $s$  values ( $4.3\%$  for *DARC* (McManus et al.  
514 2017) and  $20\% > s > 10\%$  (Saunders et al. 2005) or  $4.4\%$  (Tishkoff et  
515 al. 2001) for *G6PD*) than those of the two haplotypes. Therefore,  
516 the  $s$  values of the two haplotypes do not display conformation to  
517 any specific group of genes with particular function. Nevertheless,  
518 the  $s$  values of the two haplotypes ( $s = 1.9\text{-}2.9\%$ ), which emerged  
519 from standing genetic variation and under recent selection, are  
520 similar to  $s$  of another gene that also has haplotypes from standing  
521 genetic variation and under recent selection at the same time in  
522 distinct populations, *KITLG* ( $s = 1\text{-}2\%$ ) (Beleza et al. 2013).  
523 Comparison of onsets with those of other genes under selective

524 sweep

525 Peter et al. (2012) assumed the C allele at rs2294008 as a  
526 single origin target allele and estimated onset age of selection and  
527  $s$  in YRI. Their estimates for the onset age as 8000 ya (95%CI:  
528 1000-54900) and  $s = 3.5\%$  (95%CI: 0.4-15%) are in concordance  
529 with our estimations of the C-A-G haplotype in YRI.

530 Smith et al. (2017) also estimated the onset age of  
531 selection of target alleles at five genes that are under recent  
532 ongoing positive selection but are not fixed in any populations of  
533 1KGP. The study concluded that positive selection has acted in  
534 most human populations 50 kya or more recently. The values of  $t_D$   
535  $\pm$  SD (3-55 kya) for the selected C-C-A/C-A-G haplotypes overlap  
536 with the range of estimations by Smith et al. (2017). This suggests  
537 that the two haplotypes are also associated with recent  
538 differentiation among human populations.

539 Temporal and spatial switching of target haplotype at *PSCA*

540           We consider that both C-C-A and C-A-G haplotypes each  
541 have a single origin and then spread by human expansion. The two  
542 haplotypes are locally under hard sweep in most subpopulations in  
543 EAS/SAS and AFR or soft sweep in CHB, although they are shared  
544 among all subpopulations tested.

545           Standing genetic variation contributes to rapid  
546 adaptation to environmental changes (Colosimo et al. 2005; Miller  
547 et al. 2007; Ishikawa et al. 2019). In *PSCA*, the two haplotypes are  
548 shared among all subpopulations tested. The observed major  
549 target allele in AFR is the C-A-G haplotype, whereas that in  
550 EAS/SAS is the C-C-A haplotype. Haplotypes derived from  
551 standing genetic variation respond differently and rapidly to the  
552 environments that each population encounters. This suggests that  
553 a particular local haplotype is not always adaptive among global

554 human populations and such local adaptive haplotype(s) may not  
555 always be the same or only adaptive haplotype(s) in other  
556 subpopulations.

557           We also observe that target alleles can change within a  
558 lineage. For example, a target allele was both C-C-A and C-A-G in  
559 a common ancestor of EAS, but it changed to only C-C-A in  
560 JPT/CHS/CDX/KHV. This suggests that local ‘adaptive’ alleles can  
561 differ temporally and spatially.

562           In general, the same alleles emerged from standing  
563 genetic variation (e.g. *KITLG* in European/East Asian populations  
564 (Yang et al. 2018)) or independent *de novo* adaptive alleles in  
565 distinct populations (e.g. *LCT* in African/European populations  
566 (Tishkoff et al. 2007; Schlebusch et al. 2013)) are positively  
567 selected in many cases. In such cases, the selective force may be  
568 common among populations. We report that target haplotypes,

569 C-C-A and C-A-G, switched temporally and spatially. Switching of  
 570 target haplotypes may occur in future adaptations; therefore, these  
 571 haplotypes may contribute as genetic sources of adaptation. Such  
 572 target allele switching would provide a chance for individuals in a  
 573 population to respond to a rapidly changing environment. We  
 574 unveiled a unique and novel feature of positive selection in the  
 575 *PSCA* locus and this study contributes to uncovering genetic  
 576 diversity from the viewpoint of selection targets.

577

## 578 Acknowledgements

579 The authors would like to thank Drs. Shigeki Nakagome, Naoki  
 580 Osada, Hie Lim Kim, Tatsuya Ota and Jun Gojobori for valuable  
 581 advice and discussion in this project, as well as colleagues in our  
 582 University. Furthermore, we also thank Dr. Quintin Lau for  
 583 English editing. This work has been supported in part by the

584 Graduate University for Advanced Studies, SOKENDAI.

585

## 586 Author contribution statement

587 RLI was responsible for reviewing the literature, conducting the

588 research, extracting and analyzing data, interpreting results and

589 writing the manuscript. YS was responsible for extracting and

590 analyzing data, interpretation and discussion of results and

591 amending the manuscript.

592

## 593 Conflict of interest

594 The authors declare no conflict of interest.

595

## 596 References

597 The 1000 Genomes Project Consortium (2015). A global reference

598 for human genetic variation. *Nature* **526**:68-74.



599 Albers PK, McVean G (2020). Dating genomic variants and shared  
600 ancestry in population-scale sequencing data. *PLoS Biol*  
601 **18**:e3000586.

602 Beleza S, Santos AM, McEvoy B, Alves I, Martinho C, Cameron E  
603 et al. (2013). The timing of pigmentation lightening in  
604 Europeans. *Mol Biol Evol* **30**:24-35.

605 Benjamini Y, Hochberg Y (1995). Controlling the false discovery  
606 rate: a practical and powerful approach to multiple testing.  
607 *J Roy Stat Soc Ser B* **57**:289-300.

608 Brown MB (1975). 400: A Method for Combining Non-Independent,  
609 One-Sided Tests of Significance. *Biometrics* **31**:987-92.

610 Busby GB, Band G, Si Le Q, Jallow M, Bougama E, Mangano VD  
611 et al. (2016). Malaria Genomic Epidemiology Network.  
612 Admixture into and within sub-Saharan Africa. *Elife*  
613 **5**:e15266.

614 Colosimo PF, Hosemann KE, Balabhadra S, Villarreal GJ, Dickson  
615 M, Grimwood J et al. (2005). Widespread parallel  
616 evolution in sticklebacks by repeated fixation of  
617 Ectodysplasin alleles. *Science* **307**:1928-33.

618 Evans PD, Gilbert SL, Mekel-Bobrov N, Vallender EJ, Anderson  
619 JR, Vaez-Azizi LM et al. (2005). Microcephalin, a gene  
620 regulating brain size, continues to evolve adaptively in  
621 humans. *Science*, **309**:1717–1720.

622 Excoffier L, Dupanloup I, Huerta-Sánchez E, Sousa VC, Foll M  
623 (2013). Robust demographic inference from genomic and  
624 SNP data. *PLoS Genet* **9**:e1003905.

625 Fan S, Kelly DE, Beltrame MH, Hansen MEB, Mallick S, Ranciaro  
626 A et al. (2019). African evolutionary history inferred from  
627 whole genome sequence data of 44 indigenous African  
628 populations. *Genome Biol* **20**:82.

629 Fenner JN (2005). Cross-cultural estimation of the human  
630 generation interval for use in genetics-based population  
631 divergence studies. *American journal of physical*  
632 *anthropology* **128**:415–423.

633 Ferrer-Admetlla A., Liang M, Korneliussen T, Nielsen R (2014).  
634 On detecting incomplete soft or hard selective sweeps  
635 using haplotype structure. *Mol Biol Evol* **31**:1275–1291.

636 Fujito NT, Satta Y, Hayakawa T, Takahata N (2018). A new  
637 inference method for detecting an ongoing selective sweep.  
638 *Genes Genet Syst* **93**:149-161.

639 Gakuhari T, Nakagome S, Rasmussen S Allentoft ME, Sato T,  
640 Korneliussen T et al. (2020). Ancient Jomon genome  
641 sequence analysis sheds light on migration patterns of  
642 early East Asian populations. *Commun Biol* **3**: 437.

643 Gerbault P, Moret C, Currat M, Sanchez-Mazas A (2009). Impact of

644 selection and demography on the diffusion of lactase  
645 persistence. *PLoS One* **4**:e6369.

646 Gurdasani D, Carstensen T, Tekola-Ayele F, Pagani L,  
647 Tachmazidou I, Hatzikotoulas K et al. (2015). The African  
648 Genome Variation Project shapes medical genetics in  
649 Africa. *Nature* **517**:327-32.

650 Haber M, Jones AL, Connell BA, Asan, Arciero E, Yang H et al.  
651 (2019). A Rare Deep-Rooting D0 African Y-Chromosomal  
652 Haplogroup and Its Implications for the Expansion of  
653 Modern Humans Out of Africa. *Genetics* **212**:1421-1428.

654 Henn BM, Gignoux CR, Jobin M, Granka JM, Macpherson JM,  
655 Kidd JM et al. (2011). Hunter-gatherer genomic diversity  
656 suggests a southern African origin for modern humans.  
657 *Proc Natl Acad Sci U S A* **108**:5154-62.

658 Hudson RR (2002). Generating samples under a Wright-Fisher

659 neutral model of genetic variation. *Bioinformatics*

660 18:337-338.

661 Ishikawa A, Kabeya N, Ikeya K, Kakioka R, Cech JN, Osada N et

662 al. (2019). A key metabolic gene for recurrent freshwater

663 colonization and radiation in fishes. *Science* 364:886-889.

664 Itan, Y., Powell, A., Beaumont, M. A., Burger, J., & Thomas, M. G

665 (2009). The origins of lactase persistence in Europe. *PLoS*

666 *computational biology* 5:e1000491.

667 Iwasaki RL, Ishiya K, Kanzawa-Kiriyama H, Kawai Y, Gojobori J,

668 Satta Y (2020). Evolutionary History of the Risk of SNPs

669 for Diffuse-Type Gastric Cancer in the Japanese

670 Population. *Genes (Basel)*. 11:775.

671 Jones DA, Wakeley J (2008). The influence of gene conversion on

672 linkage disequilibrium around a selective sweep. *Genetics*

673 180:1251–1259.

674 Kamberov YG, Wang S, Tan J, Gerbault P, Wark A, Tan L (2013).  
675 Modeling recent human evolution in mice by expression of  
676 a selected EDAR variant. *Cell* **152**:691–702.

677 Kanzawa-Kiriyama H, Jinam TA, Kawai Y, Sato T, Hosomichi, K,  
678 Tajima, A et al. (2019). Late Jomon male and female  
679 genome sequences from the Funadomari site in Hokkaido,  
680 Japan. *Anthropol. Sci.* **127**:83-109.

681 Key FM, Abdul-Aziz MA, Mundry R, Peter BM, Sekar A, D'Amato  
682 M et al. (2018). Human local adaptation of the TRPM8  
683 cold receptor along a latitudinal cline. *PLoS Genet*  
684 **14**:e1007298.

685 Lachance J, Vernot B, Elbers CC, Ferwerda B, Froment A, Bodo  
686 JM et al. (2012). Evolutionary history and adaptation  
687 from high-coverage whole-genome sequences of diverse  
688 African hunter-gatherers. *Cell* **150**:457-69.

689 McManus KF, Taravella AM, Henn BM, Bustamante CD, Sikora M,  
690 Cornejo OE (2017). Population genetic analysis of the  
691 DARC locus (Duffy) reveals adaptation from standing  
692 variation associated with malaria resistance in humans.  
693 *PLoS Genet* **13**:e1006560.

694 Miller CT, Beleza S, Pollen AA, Schluter D, Kittles RA, Shriver MD  
695 et al. (2007). cis-Regulatory changes in Kit ligand  
696 expression and parallel evolution of pigmentation in  
697 sticklebacks and humans. *Cell* **131**:1179-89.

698 Nakagome S, Hudson RR, Di Rienzo, A (2019). Inferring the model  
699 and onset of natural selection under varying population  
700 size from the site frequency spectrum and haplotype  
701 structure. *Proceedings Biological sciences* **286**:20182541.

702 Oleksyk TK, Smith MW, O'Brien SJ (2010). Genome-wide scans for  
703 footprints of natural selection. *Philos Trans R Soc Lond B*

704 *Biol Sci* 365:185-205.

705 Peter BM, Huerta-Sanchez E, Nielsen R (2012). Distinguishing  
706 between selective sweeps from standing variation and  
707 from a de novo mutation. *PLoS Genet* 8:e1003011.

708 Pickrell JK, Coop G, Novembre J, Kudaravalli S, Li JZ, Absher D  
709 et al. (2009). Signals of recent positive selection in a  
710 worldwide sample of human populations. *Genome Res*  
711 19:826-37.

712 Rees JS, Castellano S, Andrés, AM (2020). The Genomics of  
713 Human Local Adaptation. *Trends in genetics* 36:415–428.

714 Satta Y, Zheng W, Nishiyama KV, Iwasaki RL, Hayakawa T, Fujito  
715 NT et al. (2020). Two-dimensional site frequency  
716 spectrum for detecting, classifying and dating incomplete  
717 selective sweeps. *Genes & genetic systems*, 94:283–300.

718 Saunders MA, Slatkin M, Garner C, Hammer MF, Nachman MW



719 (2005). The extent of linkage disequilibrium caused by  
720 selection on G6PD in humans. *Genetics* **171**:1219-29.

721 Schaffner SF, Foo C, Gabriel S, Reich D, Daly MJ, Altshuler D  
722 (2005). Calibrating a coalescent simulation of human  
723 genome sequence variation. *Genome Res* **15**:1576-83.

724 Schlebusch CM, Sjödin P, Skoglund P, Jakobsson M (2012).  
725 Stronger signal of recent selection for lactase persistence  
726 in Maasai than in Europeans. *Eur J Hum Genet* **21**:550-3.

727 Schrider DR, Kern AD (2017). Soft Sweeps Are the Dominant Mode  
728 of Adaptation in the Human Genome. *Mol Biol Evol*  
729 **34**:1863-1877.

730 Smith J, Coop G, Stephens M, Novembre J (2018). Estimating  
731 Time to the Common Ancestor for a Beneficial Allele. *Mol*  
732 *Biol Evol* **35**:1003-1017.

733 Soares P, Alshamali F, Pereira JB, Fernandes V, Silva NM, Afonso

734 C et al.. (2012). The Expansion of mtDNA Haplogroup L3  
735 within and out of Africa. *Mol Biol Evol* **29**:915-27.

736 The Study Group of Millennium Genome Project for Cancer (2008).  
737 Genetic variation in PSCA is associated with  
738 susceptibility to diffuse-type gastric cancer. *Nat Genet*  
739 **40**:730-40.

740 Tanikawa C, Urabe Y, Matsuo K, Kubo M, Takahashi A, Ito H et al.  
741 (2012). A genome-wide association study identifies two  
742 susceptibility loci for duodenal ulcer in the Japanese  
743 population. *Nat Genet* **44**:430-4.

744 Terhorst J, Kamm JA, Song YS (2017). Robust and scalable  
745 inference of population history from hundreds of  
746 unphased whole genomes. *Nat Genet* **49**:303-309.

747 Tishkoff SA, Reed FA, Ranciaro A, Voight BF, Babbitt CC,  
748 Silverman JS et al. (2007). Convergent adaptation of

749 human lactase persistence in Africa and Europe. *Nat*  
750 *Genet* **39**:31-40.

751 Tishkoff SA, Varkonyi R, Cahinhinan N, Abbes S, Argyropoulos G,  
752 Destro-Bisol G et al. (2001). Haplotype diversity and  
753 linkage disequilibrium at human G6PD: recent origin of  
754 alleles that confer malarial resistance. *Science*  
755 **293**:455-62.

756 Wang X, Grus WE, Zhang J (2006). Gene losses during human  
757 origins. *PLoS Biol* **4**:e52.

758 Wang Y, Lu D, Chung YJ, Xu S (2018). Genetic structure,  
759 divergence and admixture of Han Chinese, Japanese and  
760 Korean populations. *Hereditas*. **155**:19.

761 Xue Y, Daly A, Yngvadottir B, Liu M, Coop G, Kim Y (2006).  
762 Spread of an inactive form of caspase-12 in humans is due  
763 to recent positive selection. *Am J Hum Genet* **78**:659-70.

764 Yang Z, Shi H, Ma P, Zhao S, Kong Q, Bian T et al. (2018).  
765 Darwinian Positive Selection on the Pleiotropic Effects of  
766 KITLG Explain Skin Pigmentation and Winter  
767 Temperature Adaptation in Eurasians. *Mol Biol Evol*  
768 **35**:2272-2283.

769 Yasukochi Y, Satta Y (2013). Current perspectives on the intensity  
770 of natural selection of MHC loci. *Immunogenetics*  
771 **65**:479-83.

772

## 773 Figure legends

774 **Figure 1.** The relationships among haplotypes.

775 The C haplotype, with a C allele at the first position of three SNPs  
776 (rs2294008, rs2976391 and rs2978983), diverged from the T  
777 haplotype around 1 mya (Albers and McVean 2020). Within the C  
778 haplotype, the C-A-G haplotype with two derived alleles at

rs2976391 and rs2978983 diverged from the C-C-A haplotype  
around 170 kya (Albers and McVean 2020).

**Figure 2.** Values of  $t_D \pm SD$  in populations under positive selection  
are limited to within 3-55 kya.

Note that the C-C-A haplotype in ESN and the C-A-G haplotype in  
CEU/PEL/CHS are excluded because they have marginal/unusual  
signals (see main text). (A) Values of  $t_D \pm SD$  for the C-C-A  
haplotype. (B) Values of  $t_D \pm SD$  for the C-A-G haplotype. The X  
markers represent the  $t_D$  values and the double-sided arrows  
represent the ranges of  $t_D \pm SD$ . Red, orange and green represent  
East Asian, South Asian and African subpopulations, respectively.

**Figure 3.** Transition of target alleles throughout human history.  
Summary of positive selection signals detected on C-A-G and  
C-C-A haplotypes in 1KGP 26 subpopulations. Filled pink/blue,  
dashed and open pink/blue circles indicate ongoing positive

794 selection on C-C-A/C-A-G, completed positive selection on C-C-A  
795 and no significant signals of selection on C-C-A/C-A-G, respectively.  
796 The phylogeny of the 26 subpopulations was constructed using the  
797 neighbor-joining method of pairwise  $F_{ST}$  values (The 1000  
798 Genomes Project Consortium 2015). Transition process of selection  
799 target haplotype is inferred from the extant target haplotype, their  
800  $t_D$  values as well as subpopulation divergence times. In cases with  
801 no available divergence time data of subpopulations, we inferred  
802 timing of transition in a parsimonious manner.

803 **Figure 4.** Inferred timing of onsets of positive selection and  
804 selection coefficients in JPT/CHB/YRI.

805 (A) Violin plot of the timing of positive selection onsets estimated  
806 from the ABC framework. Double sided arrows indicate  $t_D \pm SD$ .  
807 See Table 2 for means (and 95% CI) of timing onsets of positive  
808 selection and Table 1 for ranges of  $t_D \pm SD$ . (B) Violin plot of

809 selection coefficients. See Table 2 for means (and 95% CI) of

810 selection coefficients.

Table 1. 2D-SFS and  $t_e$  values for 26 subpopulations.

| Population                       | JPT                                                        |                     | CHB                 |                     | CHS                 |                     | CDX                 |                     | KHV                 |                     |
|----------------------------------|------------------------------------------------------------|---------------------|---------------------|---------------------|---------------------|---------------------|---------------------|---------------------|---------------------|---------------------|
| Core region                      | 143755915-143770914                                        |                     | 143755876-143771875 |                     | 143755915-143771914 |                     | 143755915-143771914 |                     | 143755915-143771914 |                     |
| Targeting subhaplotype           | C-C-A                                                      | C-A-G               | C-C-A               | C-A-G               | C-C-A               | C-A-G               | C-C-A               | C-A-G               | C-C-A               | C-A-G               |
| n                                | 37                                                         | 40                  | 79                  | 74                  | 71                  | 80                  | 71                  | 64                  | 70                  | 73                  |
| Frequency of tested allele       | 0.178                                                      | 0.192               | 0.383               | 0.359               | 0.338               | 0.381               | 0.382               | 0.344               | 0.354               | 0.369               |
| S                                | 91                                                         |                     | 88                  |                     | 89                  |                     | 82                  |                     | 89                  |                     |
| F <sub>s</sub>                   | 0.0112<br>(0.035)*                                         | 0.0483<br>(0.296)   | 0.0196<br>(0.035)*  | 0.0156<br>(0.023)*  | 0.0094<br>(0.009)** | 0.0230<br>(0.052)   | 0.0146<br>(0.015)*  | 0.0899<br>(0.547)   | 0.0080<br>(0.007)** | 0.0302<br>(0.086)   |
| Q <sub>st</sub>                  | 1.50<br>(0.180)                                            | 2.17<br>(0.287)     | 1.90<br>(0.055)     | 1.78<br>(0.057)     | 2.00<br>(0.115)     | 2.44<br>(0.137)     | 2.40<br>(0.171)     | 3.43<br>(0.313)     | 1.50<br>(0.039)*    | 2.73<br>(0.186)     |
| L <sub>st</sub>                  | 0.0006<br>(0.046)*                                         | 0.0024<br>(0.273)   | 0.0031<br>(0.020)*  | 0.0026<br>(0.023)*  | 0.0016<br>(0.007)** | 0.0035<br>(0.042)*  | 0.0021<br>(0.017)*  | 0.0042<br>(0.399)   | 0.0015<br>(0.007)** | 0.0051<br>(0.117)   |
| G' <sub>st</sub>                 | 2.00                                                       | 8.00                | 4.00                | 8.00                | 6.00                | 3.17                | 3.33                | 6.67                | 2.00                | 4.80                |
| γ*(10)                           | 0.00                                                       | 0.00                | 0.00                | 0.00                | 0.00                | 0.00                | 0.00                | 0.33                | 0.00                | 0.20                |
| f <sub>max</sub>                 | 0                                                          | 0                   | 1                   | 2                   | 1                   | 5                   | 2                   | 1                   | 2                   | 1                   |
| t <sub>max</sub>                 | 2                                                          | 8                   | 5                   | 8                   | 6                   | 5                   | 4                   | 10                  | 2                   | 10                  |
| combined P                       | Marginally significant<br>(0.032, $\chi^2=7.83$ , df=2.44) |                     |                     |                     |                     |                     |                     |                     |                     |                     |
| selection operated? <sup>1</sup> | ongoing                                                    | No                  | ongoing             | ongoing             | ongoing             | No                  | ongoing             | No                  | ongoing             | No                  |
| t <sub>e</sub> (years ago)       | 10811                                                      | 43333               | 30063               | 27027               | 17606               | 34375               | 21127               | 46875               | 16071               | 51370               |
| SD of t <sub>e</sub> (years ago) | 8058                                                       | 27689               | 12358               | 14333               | 11135               | 13073               | 10563               | 25615               | 6916                | 22062               |
| Population                       | BEB                                                        |                     | PUL                 |                     | GHI                 |                     | ITU                 |                     | STU                 |                     |
| Core region                      | 143754477-143778476                                        |                     | 143756811-143778810 |                     | 143755915-143778914 |                     | 143754412-143778411 |                     | 143754811-143778810 |                     |
| Targeting subhaplotype           | C-C-A                                                      | C-A-G               | C-C-A               | C-A-G               | C-C-A               | C-A-G               | C-C-A               | C-A-G               | C-C-A               | C-A-G               |
| n                                | 41                                                         | 68                  | 34                  | 70                  | 29                  | 76                  | 55                  | 67                  | 66                  | 72                  |
| Frequency of tested allele       | 0.238                                                      | 0.395               | 0.177               | 0.365               | 0.141               | 0.369               | 0.270               | 0.328               | 0.324               | 0.353               |
| S                                | 123                                                        |                     | 129                 |                     | 107                 |                     | 121                 |                     | 123                 |                     |
| F <sub>s</sub>                   | 0.0194<br>(0.023)**                                        | 0.2379<br>(0.544)   | 0.0500<br>(0.247)   | 0.0592<br>(0.112)   | 0.0357<br>(0.309)   | 0.0673<br>(0.255)   | 0.0511<br>(0.074)   | 0.2443<br>(0.646)   | 0.0472<br>(0.053)   | 0.0286<br>(0.126)   |
| Q <sub>st</sub>                  | 1.90<br>(0.017)*                                           | 2.45<br>(0.184)     | 1.43<br>(0.168)     | 1.94<br>(0.072)     | 1.50<br>(0.212)     | 2.85<br>(0.288)     | 1.33<br>(0.025)*    | 2.26<br>(0.174)     | 1.11<br>(0.008)**   | 2.75<br>(0.175)     |
| L <sub>st</sub>                  | 0.0006<br>(0.002)**                                        | 0.0079<br>(0.148)   | 0.0017<br>(0.147)   | 0.0058<br>(0.067)   | 0.0009<br>(0.161)   | 0.0055<br>(0.095)   | 0.0011<br>(0.013)*  | 0.0061<br>(0.148)   | 0.0014<br>(0.008)** | 0.0014<br>(0.126)   |
| G' <sub>st</sub>                 | NaN                                                        | 5.83                | 2.00                | 3.43                | 3.00                | 4.00                | 3.00                | 4.43                | 2.00                | 5.67                |
| γ*(10)                           | NaN                                                        | 0.33                | 0.00                | 0.00                | 0.00                | 0.00                | 0.00                | 0.14                | 0.00                | 0.17                |
| f <sub>max</sub>                 | 0                                                          | 8                   | 1                   | 5                   | 0                   | 10                  | 1                   | 6                   | 1                   | 9                   |
| t <sub>max</sub>                 | 1                                                          | 12                  | 2                   | 7                   | 3                   | 9                   | 3                   | 12                  | 2                   | 16                  |
| combined P                       |                                                            |                     |                     |                     |                     |                     |                     |                     |                     |                     |
| selection operated? <sup>1</sup> | ongoing                                                    | No                  | No                  | No                  | No                  | No                  | completed           | No                  | completed           | No                  |
| t <sub>e</sub> (years ago)       | 8130                                                       | 60049               | 26738               | 45455               | 17991               | 42334               | 12121               | 53483               | 12626               | 50926               |
| SD of t <sub>e</sub> (years ago) | 4065                                                       | 21888               | 10695               | 13927               | 10387               | 15049               | 5669                | 19067               | 4374                | 22203               |
| Population                       | FIN                                                        |                     | TSI                 |                     | GBR                 |                     | CEU                 |                     | IBS                 |                     |
| Core region                      | 143753801-143780800                                        |                     | 143755915-143778914 |                     | 143752095-143779094 |                     | 143756573-143774572 |                     | 143755915-143778914 |                     |
| Targeting subhaplotype           | C-C-A                                                      | C-A-G               | C-C-A               | C-A-G               | C-C-A               | C-A-G               | C-C-A               | C-A-G               | C-C-A               | C-A-G               |
| n                                | 13                                                         | 80                  | 16                  | 111                 | 14                  | 95                  | 20                  | 94                  | 19                  | 93                  |
| Frequency of tested allele       | 0.066                                                      | 0.404               | 0.075               | 0.519               | 0.077               | 0.522               | 0.101               | 0.475               | 0.089               | 0.435               |
| S                                | 118                                                        |                     | 123                 |                     | 126                 |                     | 98                  |                     | 136                 |                     |
| F <sub>s</sub>                   | 0.0000<br>(0.053)                                          | 0.1284<br>(0.374)   | 0.0079<br>(0.128)   | 0.1660<br>(0.332)   | 0.0000<br>(0.033)*  | 0.1269<br>(0.356)   | 0.0133<br>(0.162)   | 0.1398<br>(0.327)   | 0.0296<br>(0.254)   | 0.1141<br>(0.291)   |
| Q <sub>st</sub>                  | 0.00<br>(0.150)                                            | 5.92<br>(0.546)     | 1.00<br>(0.265)     | 4.00<br>(0.153)     | 0.00<br>(0.094)     | 6.28<br>(0.094)     | 1.00<br>(0.282)     | 3.29<br>(0.230)     | 1.25<br>(0.123)     | 3.76<br>(0.341)     |
| L <sub>st</sub>                  | 0.0000<br>(0.150)                                          | 0.0096<br>(0.143)   | 0.0001<br>(0.146)   | 0.0114<br>(0.053)   | 0.0000<br>(0.094)   | 0.0219<br>(0.190)   | 0.0002<br>(0.112)   | 0.0075<br>(0.027)*  | 0.0007<br>(0.364)   | 0.0086<br>(0.057)   |
| G' <sub>st</sub>                 | NaN                                                        | 8.38                | NaN                 | 8.25                | NaN                 | 12.00               | NaN                 | 5.00                | 2.00                | 8.22                |
| γ*(10)                           | NaN                                                        | 0.25                | NaN                 | 0.17                | NaN                 | 0.25                | NaN                 | 0.13                | 0.00                | 0.33                |
| f <sub>max</sub>                 | 0                                                          | 6                   | 0                   | 11                  | 0                   | 13                  | 1                   | 7                   | 0                   | 6                   |
| t <sub>max</sub>                 | 0                                                          | 21                  | 1                   | 25                  | 0                   | 94                  | 1                   | 18                  | 2                   | 92                  |
| combined P                       | Marginally significant<br>(0.017, $\chi^2=9.81$ , df=2.88) |                     |                     |                     |                     |                     |                     |                     |                     |                     |
| selection operated? <sup>1</sup> | No                                                         | No                  | No                  | No                  | No                  | No                  | No                  | No                  | No                  | No                  |
| t <sub>e</sub> (years ago)       | —                                                          | 65741               | 5435                | 65805               | —                   | 122417              | 5556                | 54374               | 22883               | 59841               |
| SD of t <sub>e</sub> (years ago) | —                                                          | 26498               | 5435                | 24823               | —                   | 66405               | 5556                | 24167               | 12109               | 20400               |
| Population                       | MXL                                                        |                     | PUR                 |                     | CLM                 |                     | PEL                 |                     |                     |                     |
| Core region                      | 143752915-143826914                                        |                     | 143755991-143780890 |                     | 143752389-143775388 |                     | 143752891-143765890 |                     |                     |                     |
| Targeting subhaplotype           | C-C-A                                                      | C-A-G               | C-C-A               | C-A-G               | C-C-A               | C-A-G               | C-C-A               | C-A-G               |                     |                     |
| n                                | 5                                                          | 49                  | 14                  | 94                  | 11                  | 63                  | 13                  | 83                  |                     |                     |
| Frequency of tested allele       | 0.039                                                      | 0.383               | 0.067               | 0.452               | 0.059               | 0.335               | 0.078               | 0.547               |                     |                     |
| S                                | 290                                                        |                     | 140                 |                     | 125                 |                     | 82                  |                     |                     |                     |
| F <sub>s</sub>                   | 0.0373<br>(0.635)                                          | 0.1221<br>(0.757)   | 0.0409<br>(0.521)   | 0.0957<br>(0.199)   | 0.0397<br>(0.545)   | 0.2778<br>(0.699)   | 0.0380<br>(0.704)   | 0.0086<br>(0.002)** |                     |                     |
| Q <sub>st</sub>                  | 0.83<br>(0.284)                                            | 26.21<br>(0.999)    | 1.40<br>(0.640)     | 3.88<br>(0.189)     | 3.33<br>(0.726)     | 3.50<br>(0.312)     | 1.50<br>(0.548)     | 10.78<br>(0.478)    |                     |                     |
| L <sub>st</sub>                  | 0.0006<br>(0.704)                                          | 0.1747<br>(0.999)   | 0.0010<br>(0.999)   | 0.0086<br>(0.038)*  | 0.0006<br>(0.802)   | 0.0051<br>(0.062)   | 0.0007<br>(0.636)   | 0.0012<br>(0.073)   |                     |                     |
| G' <sub>st</sub>                 | 0.00                                                       | 36.66               | 3.00                | 5.60                | 2.00                | 4.57                | 2.00                | 23.00               |                     |                     |
| γ*(10)                           | 0.00                                                       | 0.78                | 0.00                | 0.20                | 0.00                | 0.00                | 0.00                | 0.50                |                     |                     |
| f <sub>max</sub>                 | 0                                                          | 19                  | 1                   | 13                  | 1                   | 15                  | 0                   | 1                   |                     |                     |
| t <sub>max</sub>                 | 4                                                          | 48                  | 3                   | 18                  | 2                   | 9                   | 2                   | 92                  |                     |                     |
| combined P                       | Not significant<br>(0.052, $\chi^2=7.16$ , df=2.66)        |                     |                     |                     |                     |                     |                     |                     |                     |                     |
| selection operated? <sup>1</sup> | No                                                         | No                  | No                  | No                  | No                  | No                  | No                  | No                  |                     |                     |
| t <sub>e</sub> (years ago)       | 27027                                                      | 838389              | 40000               | 52766               | 31621               | 48309               | 35503               | 160463              |                     |                     |
| SD of t <sub>e</sub> (years ago) | 5405                                                       | 143970              | 20603               | 21191               | 19364               | 18875               | 26462               | 143215              |                     |                     |
| Population                       | ASW                                                        |                     | ACB                 |                     | GWD                 |                     | MSL                 |                     | ESN                 |                     |
| Core region                      | 143756015-143771014                                        |                     | 143756072-143771071 |                     | 143756352-143774351 |                     | 143752994-143781058 |                     | 143757203-143774202 |                     |
| Targeting subhaplotype           | C-C-A                                                      | C-A-G               | C-C-A               | C-A-G               | C-C-A               | C-A-G               | C-C-A               | C-A-G               | C-C-A               | C-A-G               |
| n                                | 22                                                         | 39                  | 36                  | 73                  | 48                  | 100                 | 26                  | 64                  | 57                  | 82                  |
| Frequency of tested allele       | 0.180                                                      | 0.320               | 0.188               | 0.380               | 0.212               | 0.442               | 0.153               | 0.376               | 0.288               | 0.414               |
| S                                | 133                                                        |                     | 126                 |                     | 151                 |                     | 244                 |                     | 129                 |                     |
| F <sub>s</sub>                   | 0.0667<br>(0.246)                                          | 0.0301<br>(0.008)** | 0.0719<br>(0.042)   | 0.0143<br>(0.002)** | 0.1114<br>(0.059)   | 0.0187<br>(0.002)** | 0.0459<br>(0.247)   | 0.0367<br>(0.002)** | 0.1327<br>(0.293)   | 0.0173<br>(0.002)** |
| Q <sub>st</sub>                  | 2.40<br>(0.293)                                            | 1.14<br>(0.002)**   | 4.00<br>(0.306)     | 1.50<br>(0.002)**   | 6.57<br>(0.550)     | 1.42<br>(0.002)**   | 3.18<br>(0.280)     | 1.50<br>(0.003)**   | 3.75<br>(0.152)     | 1.50<br>(0.002)**   |
| L <sub>st</sub>                  | 0.0034<br>(0.130)                                          | 0.0023<br>(0.002)** | 0.0037<br>(0.094)   | 0.0022<br>(0.002)** | 0.0064<br>(0.155)   | 0.0024<br>(0.002)** | 0.0051<br>(0.278)   | 0.0039<br>(0.003)** | 0.0056<br>(0.025)*  | 0.0033<br>(0.002)** |
| G' <sub>st</sub>                 | 3.33                                                       | 2.00                | 4.00                | 2.33                | 10.75               | 2.67                | 4.00                | 3.25                | 6.50                | 2.20                |
| γ*(10)                           | 0.00                                                       | 0.00                | 0.00                | 0.00                | 0.25                | 0.00                | 0.00                | 0.00                | 0.25                | 0.00                |
| f <sub>max</sub>                 | 0                                                          | 6                   | 1                   | 8                   | 0                   | 1                   | 1                   | 4                   | 4                   | 15                  |
| t <sub>max</sub>                 | 4                                                          | 2                   | 7                   | 3                   | 19                  | 4                   | 5                   | 5                   | 11                  | 3                   |
| combined P                       | Marginally significant<br>(0.040, $\chi^2=8.37$ , df=3.02) |                     |                     |                     |                     |                     |                     |                     |                     |                     |
| selection operated? <sup>1</sup> | No                                                         | ongoing             | No                  | ongoing             | No                  | ongoing             | No                  | ongoing             | No                  | ongoing             |
| t <sub>e</sub> (years ago)       | 72727                                                      | 27350               | 74074               | 21918               | 106481              | 18889               | 95931               | 30064               | 61920               | 25825               |
| SD of t <sub>e</sub> (years ago) | 36364                                                      | 10811               | 36289               | 8567                | 54681               | 6383                | 32315               | 8838                | 30193               | 8116                |

For  $F_s$ ,  $Q_{st}$  and  $L_{st}$ , q-value in the parentheses represents under null model. \* represents q-value < 0.05 and \*\* represents q-value < 0.01.

$n$  represents the number of samples.

$S$  represents the number of segregating sites in tested population.

<sup>1</sup>Selection status marked based on three q-values of



Table 2. The onset times and selection coefficients inferred with ABC method.

|     | Target haplotype | $s$ (mean) | $s$ (95% CI)  | onset time<br>(mean (years)) | onset time<br>(95% CI (years)) |
|-----|------------------|------------|---------------|------------------------------|--------------------------------|
| JPT | C-C-A            | 0.0189     | 0.0011–0.0958 | 7334                         | 1137–23270                     |
| CHB | C haplotype      | 0.0194     | 0.0018–0.0718 | 18174                        | 3213–59276                     |
| YRI | C-A-G            | 0.0290     | 0.0029–0.1038 | 13845                        | 2390–42027                     |

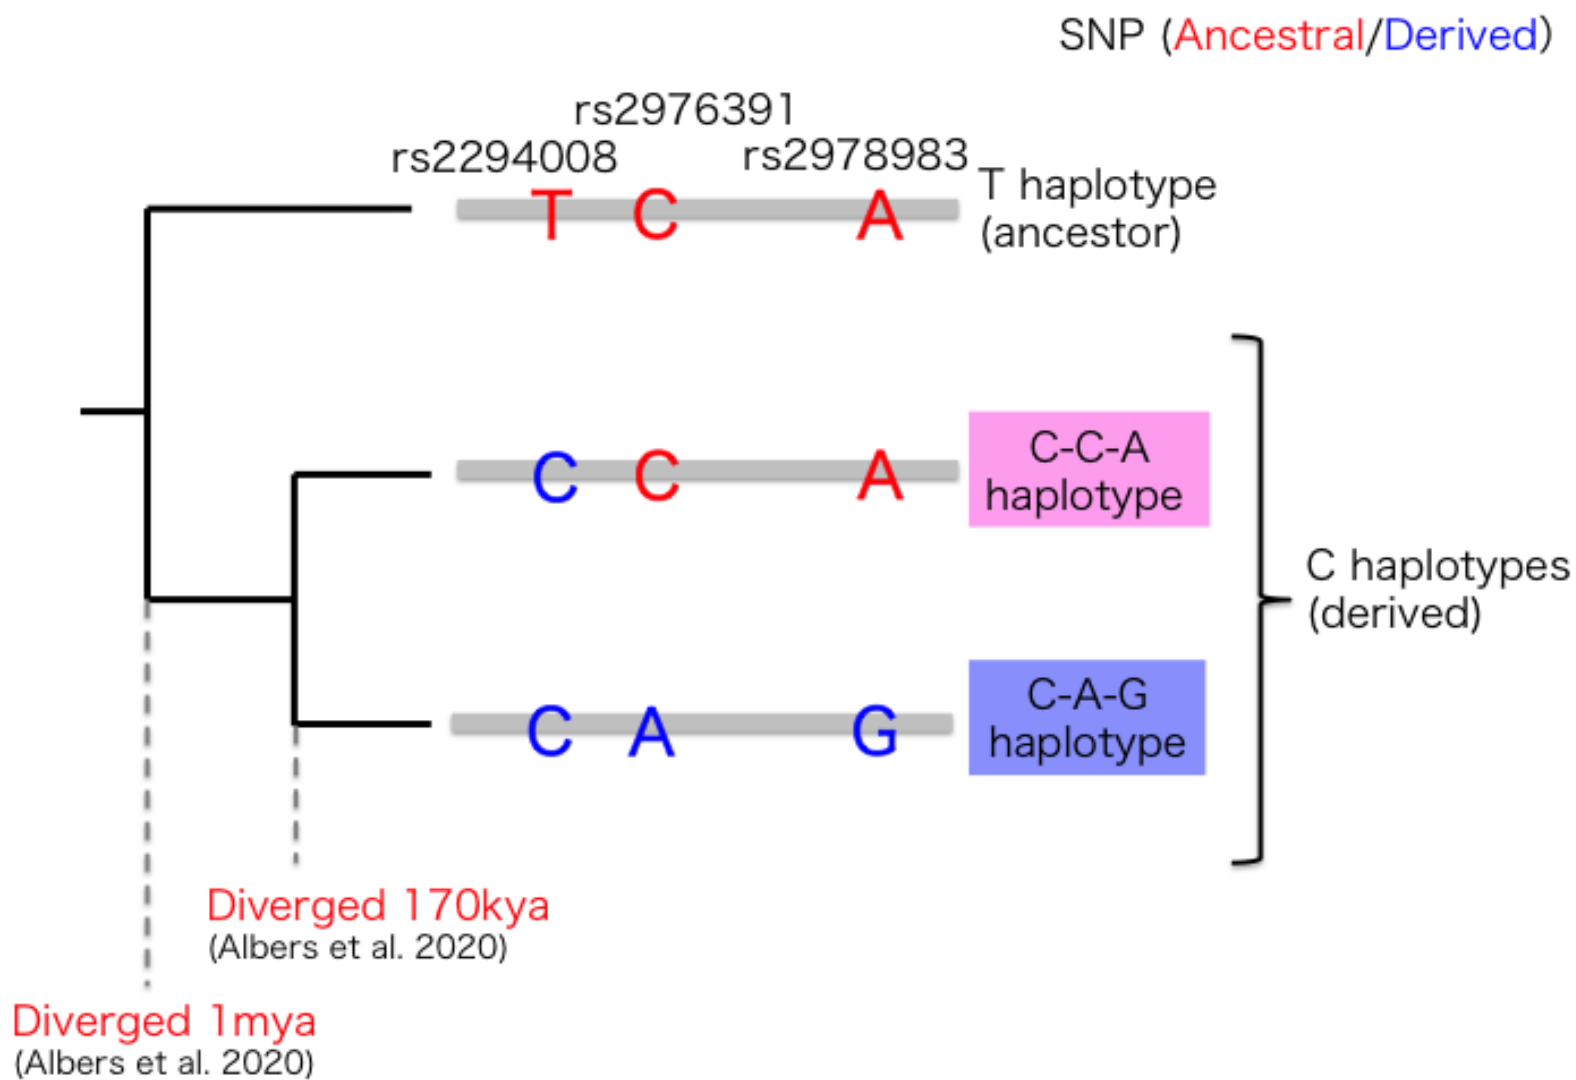

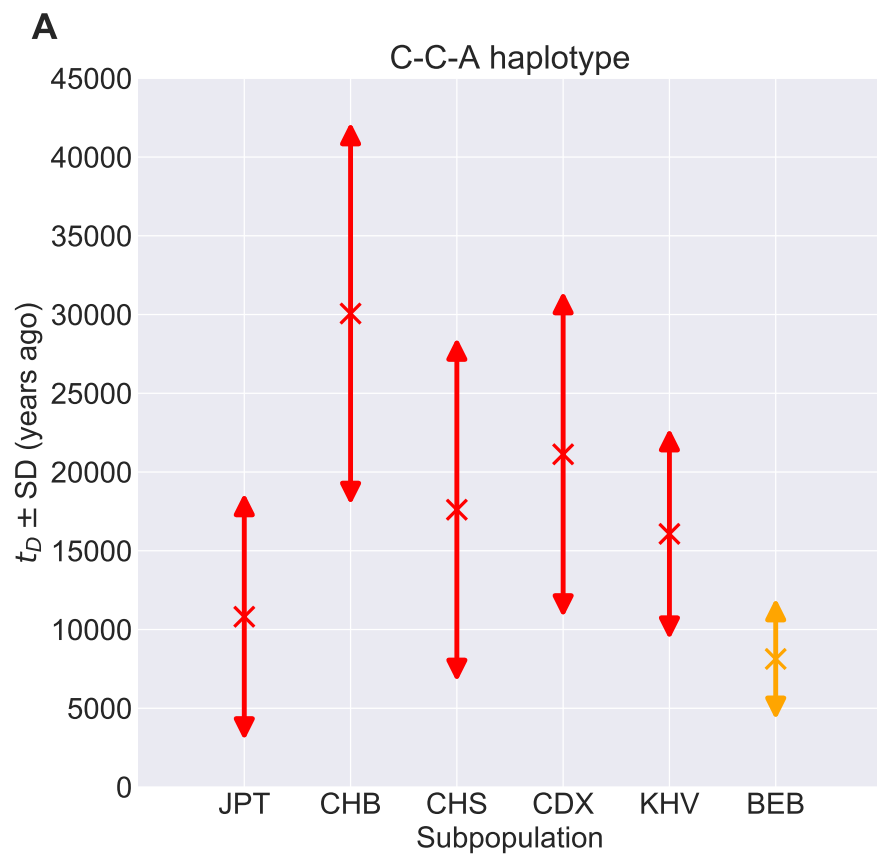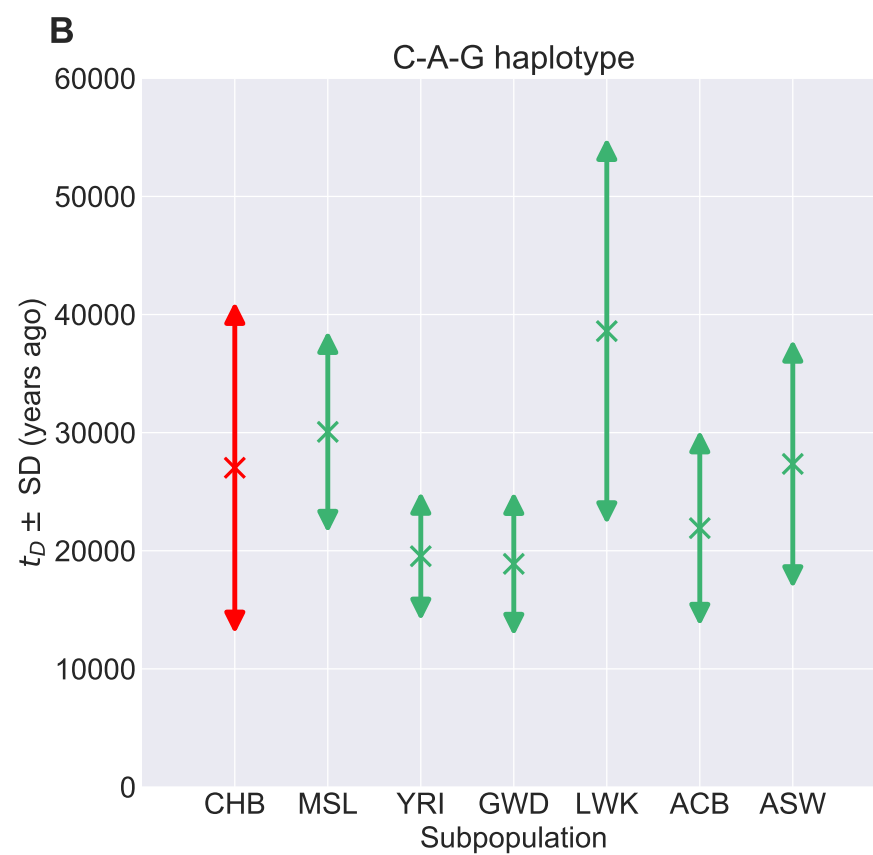

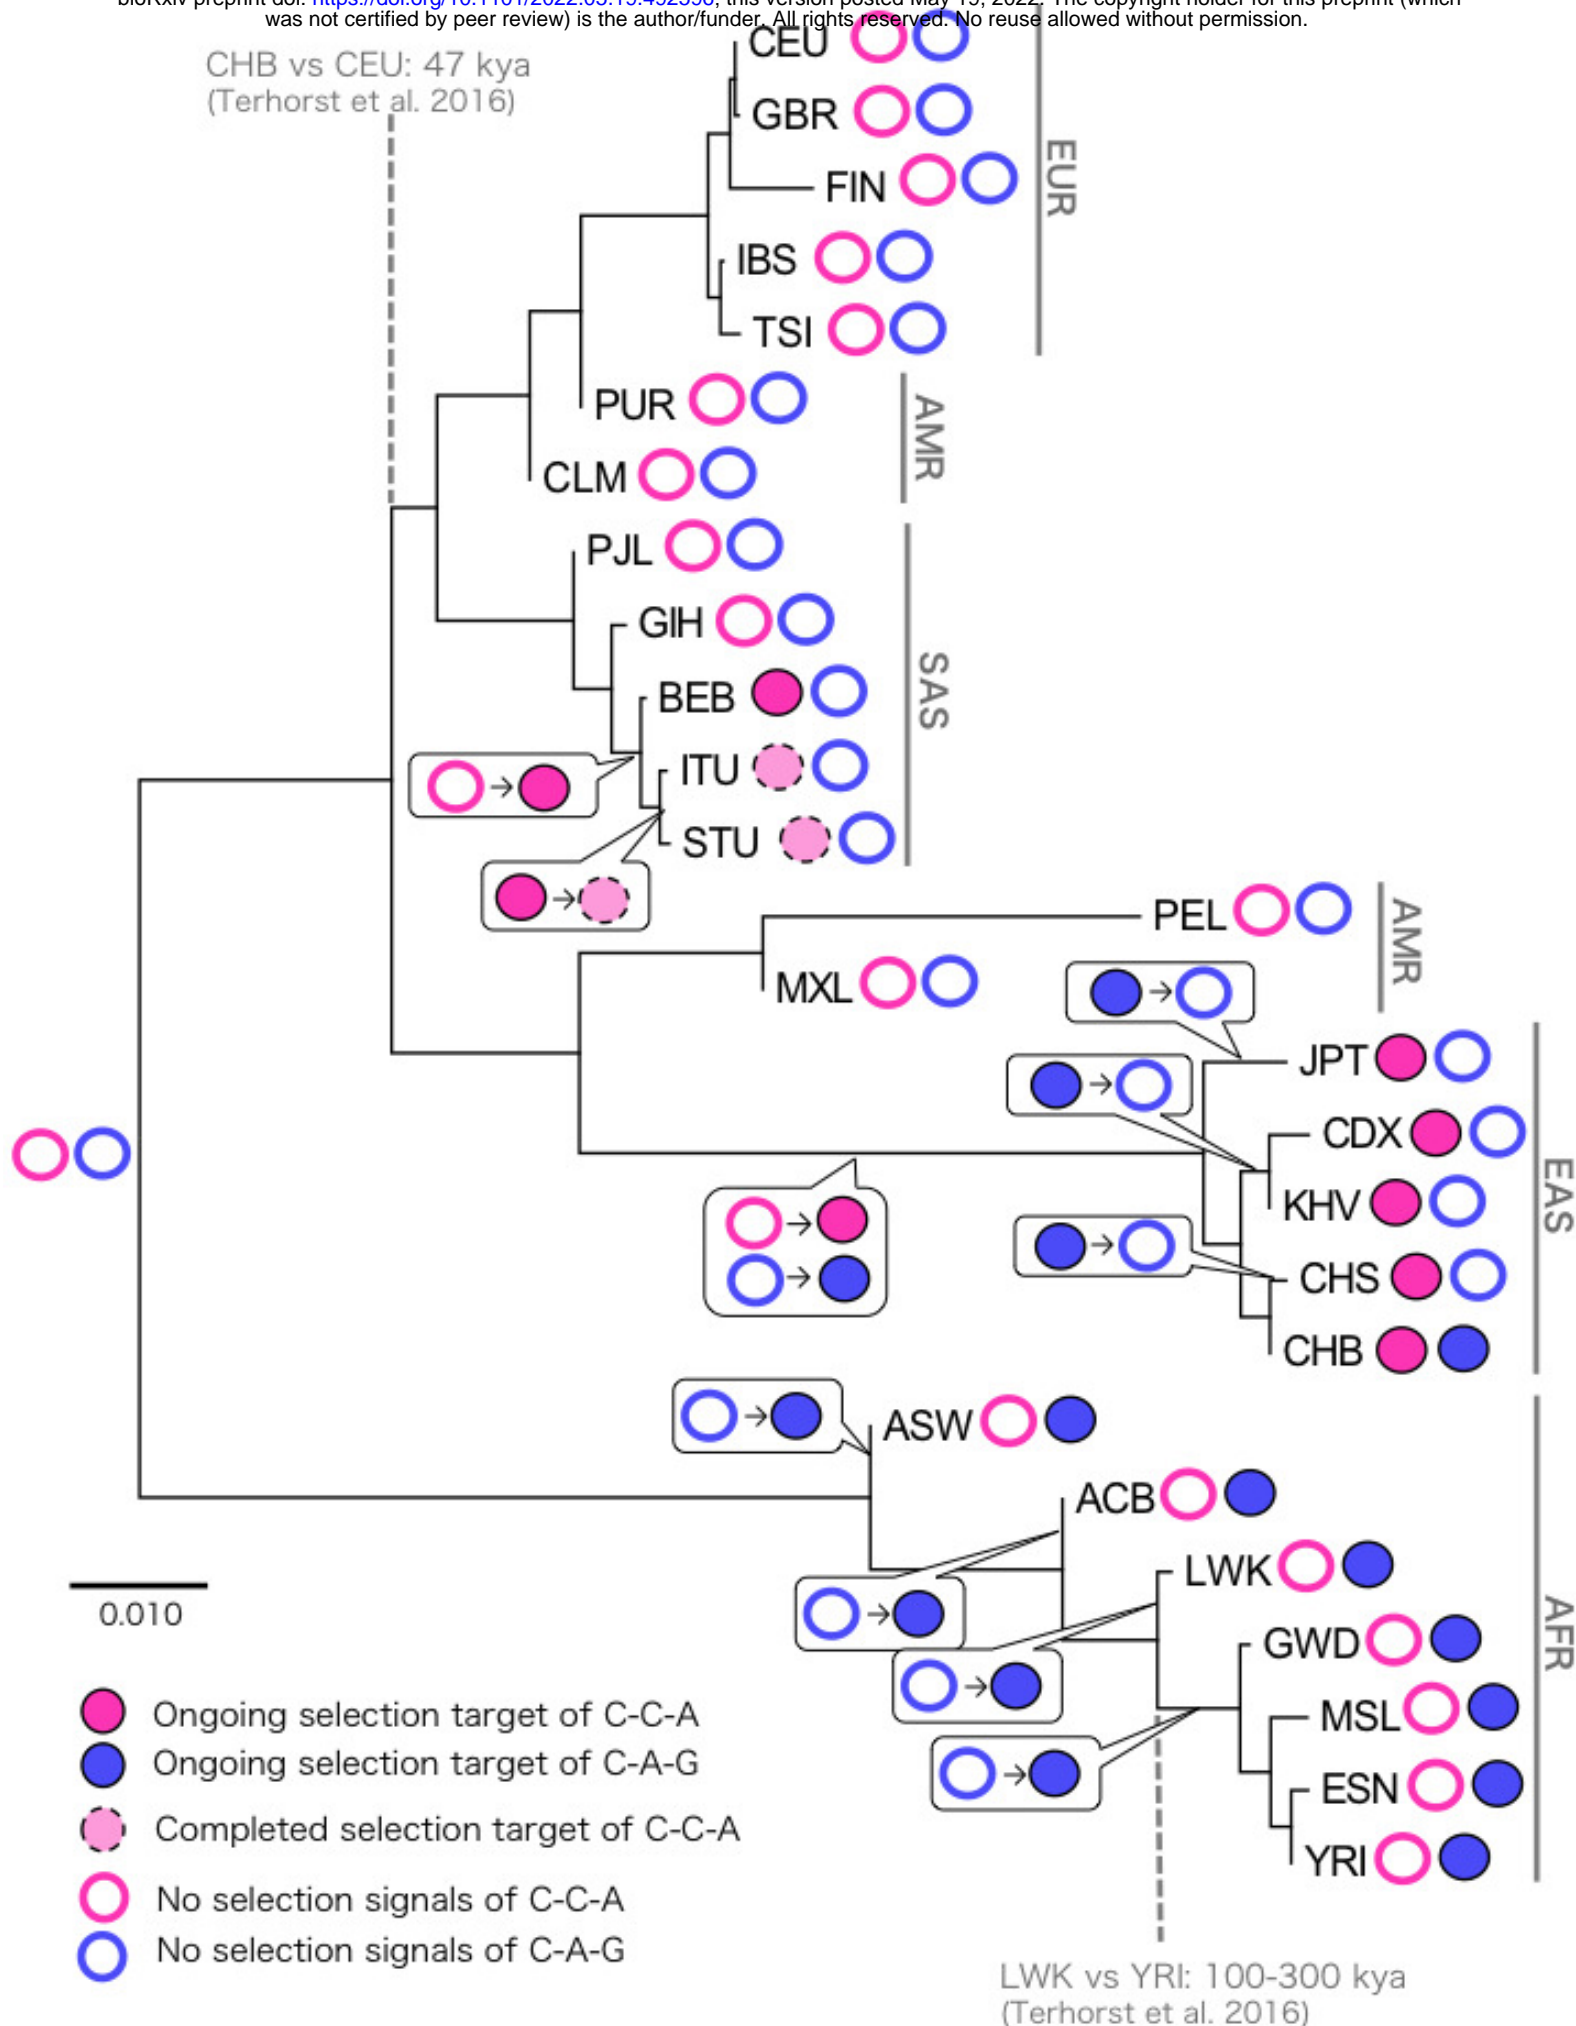

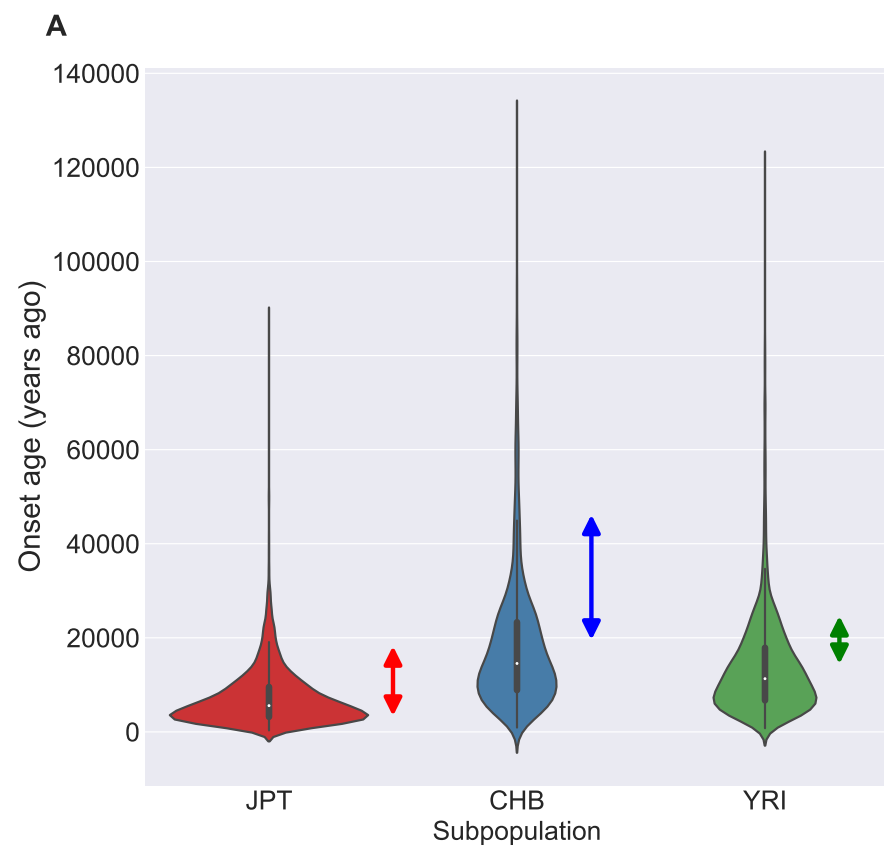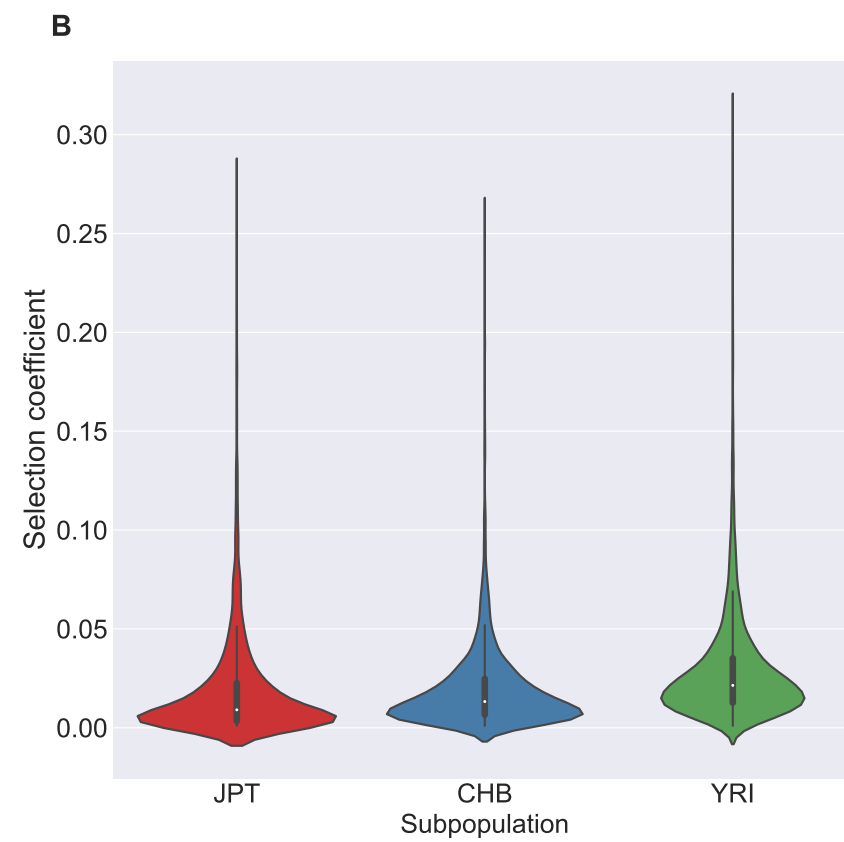

Source: https://www.biorxiv.org/content/biorxiv/early/2022/05/19/2022.05.19.492596.full.pdf
